# Supplementary material
Source: PubMed Central journal article supplement (PMC3425599)
Supplement: NIHMS2308-supplement-supplement_1.pdf [file NIHMS2308-supplement-supplement_1.pdf]

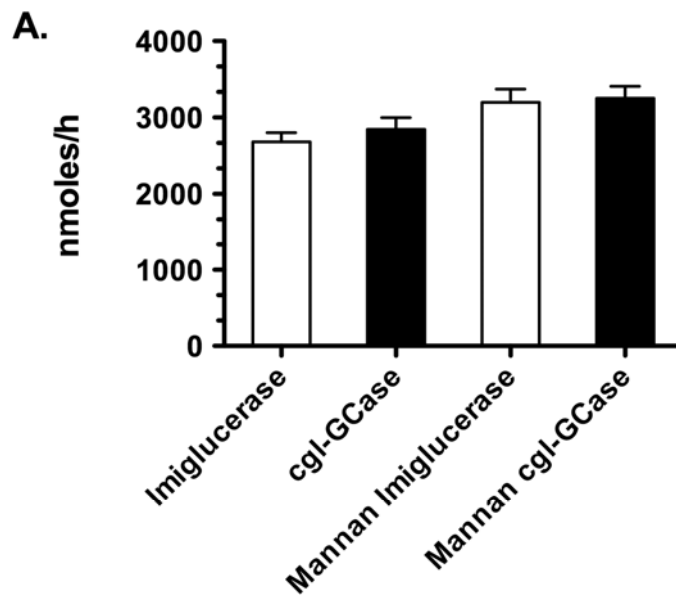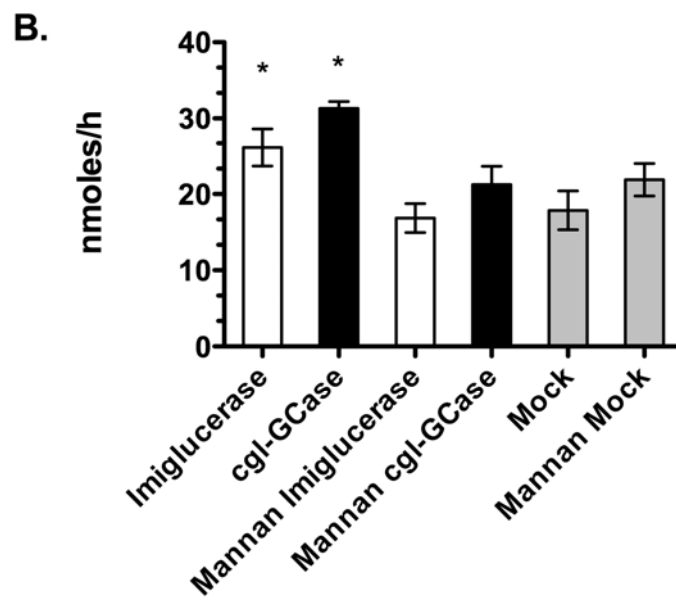

**Fig. S1**

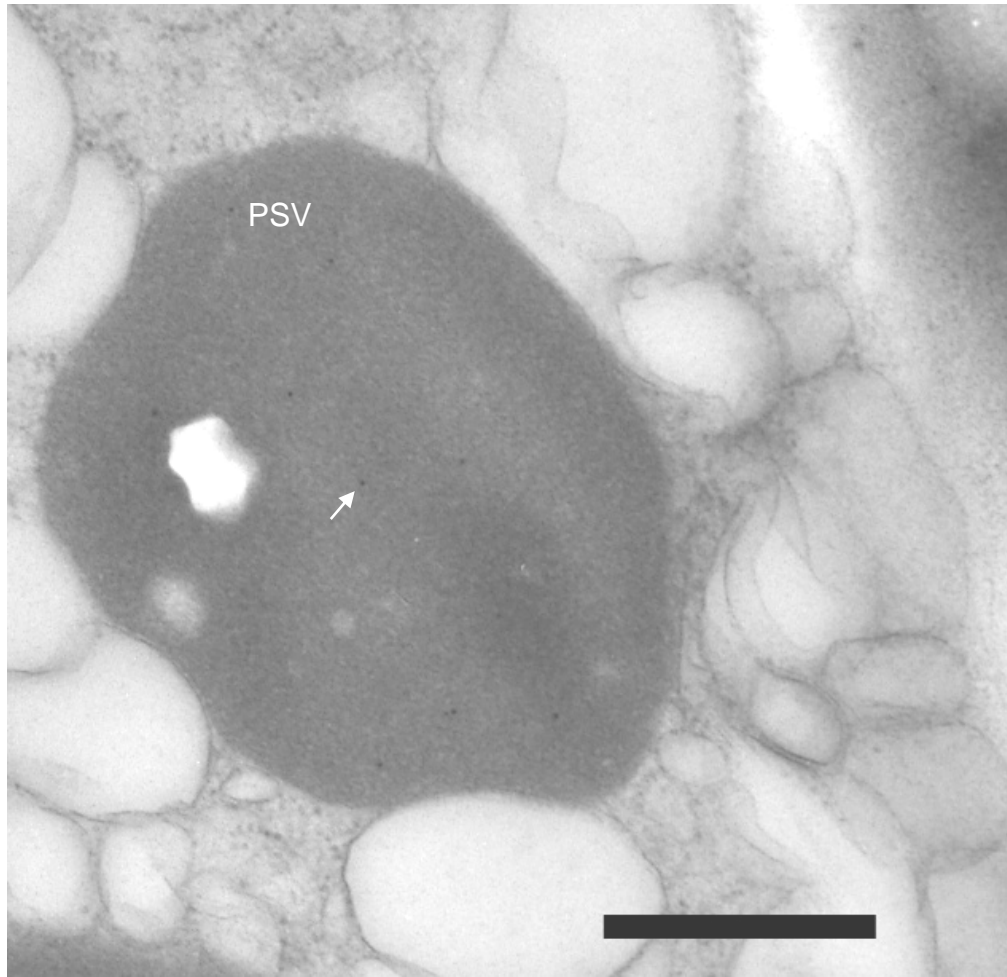

**Fig. S2**

## Supplementary Figure Legends

**Fig. S1.** Comparison of uptake of imiglucerase and *cgl*-GCCase by RAW mouse macrophages. **A.** Equivalent units of imiglucerase (white bar) or *cgl*-GCCase (black bar) were added to cells. Shown are levels of GCCase activity (nmoles/h MU released from MUGP substrate) present in the buffers (containing or lacking 20 mg/ml yeast mannan) added to the macrophage cell line. **B.** GCCase activity (nmoles/h MU released from MUGP substrate) in lysates from cells treated with imiglucerase (white bar), *cgl*-GCCase (black bar) or mock (gray bars) in buffer containing or lacking mannan. GCCase activity was normalized to intracellular  $\beta$ -*N*-acetylhexosaminidase activity. (\* $p < 0.05$  ).

**Fig. S2.** Immunogold EM localization of GCCase in transgenic *cgl* seeds. The arrow indicates a gold particle. PSV, protein storage vacuole. Bar = 500 nm.
